# Supplementary material for: Experimental demonstration of a trophic cascade in the Galápagos rocky subtidal: Effects of consumer identity and behavior
Source: PLOS journal article supplement (doi:10.1371/journal.pone.0175705), 2017-04-21
Supplement: S6 (10.1371/journal.pone.0175705.s006) [file journal.pone.0175705.s006]

**S3 Table. Observations of behavioral interactions between adult hogfish *Bodianus diplotaenia* and triggerfish preying on tethered pencil urchins *Eucidaris galapagensis* during overnight trials (2008).** Data from time lapse images taken at 2 minute intervals. Urchin survivorship data from these trials are plotted in Fig. 2C.

| Trial Name and Date          | Time       | Observation                                                                    |
|------------------------------|------------|--------------------------------------------------------------------------------|
| Baltra South 1 June 28, 2008 | 09:05:06   | Blunthead trigger attacking large urchin                                       |
|                              | 09:07:06   | “ “ “                                                                          |
|                              | 09:09:06   | Hogfish close to trigger feeding on urchin                                     |
|                              | 09:21:06   | Blunthead trigger initiating another attack on urchin , continues until 0:9:25 |
|                              | 0:9:23: 06 | 2 hogfish close to feeding trigger                                             |
|                              | 0:9:25:06  | 3 hogfish close to predated urchin, triggerfish in background                  |
|                              | 0:9:29:06  | 1 hogfish feeding on triggerfish predated urchin remains                       |
|                              | 0:9:49:06  | Another hogfish bites same urchin remains                                      |
| Baltra South July 3, 2008    | 11:39:41   | Finescale trigger begins predation on urchin                                   |
|                              | 11:43:41   | Trigger still feeding, drags small rock urchin tethered to off ledge           |
|                              | 16: 29:41  | Trigger attacks last large tethered urchin                                     |

16:31:41 Trigger still feeding on urchin, , hogfish  
close by

17:47:41 Hogfish scavenging triggerfish predated  
urchin remains
