# Supplementary material for: Experimental demonstration of a trophic cascade in the Galápagos rocky subtidal: Effects of consumer identity and behavior
Source: PLOS journal article supplement (doi:10.1371/journal.pone.0175705), 2017-04-21
Supplement: S8 (10.1371/journal.pone.0175705.s008) [file journal.pone.0175705.s008]

**S5 Table. Temperature regime during the trophic cascade experiments.** Temperatures were recorded at 5 minute intervals throughout each TC experiment by an Onset Tidbit data logger (Onset Computer Corporation, Pocasset, Massachusetts, USA,  $\pm 0.01$  °C precision) attached to one of the control bases. The temperature record for the pencil urchin TC experiment ran from 11:50 on June 23, 2012 to 11:40 on July 1, 2012, while the record for the TC experiment with green urchins extended from 12:25 on July 13, 2012 to 12:15 on July 20, 2012.

| Type of TC Experiment | Average Temperature (°C) | Standard Deviation | n     |
|-----------------------|--------------------------|--------------------|-------|
| Pencil Urchin         | 24.96                    | 0.68               | 2,304 |
| Green Urchin          | 22.85                    | 0.15               | 2,015 |
